# Supplementary material
Source: publisher site journal article supplement (https://www.dovepress.com/get_supplementary_file.php?f=473202.docx)
Supplement: Supplementary file 1 [file get_supplementary_file.php]

| **Supplementary Table S1. Primer sequences for qPCR** | | |
| --- | --- | --- |
| **Gene name** | **Forward primer sequence (5′-3′)** | **Reverse primer sequence (5′-3′)** |
| **circEZH2** | TGGAAACAGCGAAGGATA | TCGTCTGAACCTCTTGAGC |
| **EZH2** | GTGGAGAGATTATTTCTCAAGATG | CCGACATACTTCAGGGCATCAGCC |
| **CNBP** | GGAGCCCAAGAGAGAGCGA | TGGCTACATGACCAGTTTCAC |
| **TPD52** | AGCACTTAGTCCACTGCTGC | AGCCAACAGACGAAAAAGCAG |
| **MBTD1** | GGCATGGCTACCTGTGAGATG | GGCCAAAATGCTTGCCTTCT |
| **NR6A1** | GATGCAGTCGTGACAAGAACT | CTTCCGGTTCATCCCCATCTG |
| **R3HDM2** | AACACTACTCAAGAGACCCTGG | GACGCAAACTGGTATCTTCACA |
| **UHMK1** | ACGCTGTCTGTTGCTTGAACT | GGCACAATGCTGTATCATCCAC |
| **ZFAND5** | GCTAGTGGTTCCAACAGTCCT | TCGGGGTAGTTATTTTGTCCTCT |
| **GAPDH** | GGAGCGAGATCCCTCCAAAAT | GGCTGTTGTCATACTTCTCATGG |
| **U6** | CGCTTCGGCAGCACATATAC | TTCACGAATTTGCGTGTCATC |
| **Hsa-miR-495-3p** | TCGGCAGGAAACAAACATGGTG | CAACTGGTGTCGTGGAGT |

**Supplementary Table S2. Oligonucleotide sequences**

| **Name** | **Sequence (5′-3′)** | |
| --- | --- | --- |
| si-circEZH2-1 | | GCGCGGGACUAGGGAGAAUAA |
| si-circEZH2-2 | | CGCGGGACUAGGGAGAAUAUU |
| si-circEZH2-3 | | AGGGAGAAUAAUCAUGGGCCA |
| si-circEZH2-4 | | GACUAGGGAGAAUAAUCAUGG |
| si-circEZH2-5 | | GGGAGAAUAAUCAUGGGCCAG |
| si-TPD52#1 | | GCAGAGAUCAAGCGGAAACUUTT |
| si-TPD52#2 | | GAAGCAUCUAGCAGAGAUCAATT |
| si-TPD52#3 | | GAAGAGCUAAGAAGAGAACUUTT |
| miR-495-3p mimic | | AAACAAACAUGGUGCACUUCUU |

**Supplementary Table S3. List of antibodies**

| **Antibodies** | **Company and product number** |
| --- | --- |
| Goat Anti-Mouse IgG (H+L), HRP Conjugate | TransGen Biotech HS201-01 |
| Goat Anti-Rabbit IgG H&L (HRP) | Abcam ab97051 |
| β-actin | TransGen Biotech HC201 |
| E-cadherin | Cell Signaling Technology 14472 |
| Vimentin | Cell Signaling Technology 3309 |
| TPD52 | Abclonal A10254 |
| NF-κB p65 | Cell Signaling Technology 8242 |
| Phospho-NF-κB p65 (Ser536) | Cell Signaling Technology 3033 |
| Ki-67 | Abcam ab16667 |
